# Supplementary material for: Organogels from unsymmetrical π-conjugated 1,3,4-oxadiazole derivatives
Source: Royal Society of Chemistry journal article supplement (doi:10.1039/c3nj40648b), 2013-01-01
Supplement: c3nj40648b.pdf [file c3nj40648b.pdf]

**Electronic Supplementary Information** Organogels from unsymmetrical  $\pi$ -conjugated 1,3,4-oxadiazole derivatives

Chengxiao Zhao, Haitao Wang, Binglian Bai, Songnan Qu, Yan Zhang  
and Min Li\*

Key Laboratory of Automobile Materials (Jilin University), Ministry of Education, Institute of Materials Science and Engineering, Jilin University, Changchun 130012, PR China

Tabel S1. Gelation properties of 4-POXD-Bn (n= 8, 12) in different solvents.<sup>a</sup>

|             | Solvents           | 4-POXD-B8 | 4-POXD-B12 |
|-------------|--------------------|-----------|------------|
| Aromatic    | Benzene            | S         | S          |
|             | Toluene            | S         | S          |
|             | Chlorobenzene      | S         | S          |
|             | Nitrobenzene       | S         | S          |
| Chlorinated | Chloroform         | S         | S          |
|             | Dichloromethane    | S         | S          |
|             | 1,2-dichloroethane | S         | S          |
| Alkanes     | Cyclohexane        | S         | S          |
|             | n-heptane          | P         | P          |
| esters      | Ethyl acetate      | S         | S          |
|             | Methyl acetate     | S         | S          |
| ethers      | Tetrahydrofuran    | S         | S          |
|             | Diethyl ether      | S         | S          |
| ketones     | Acetone            | P         | P          |
|             | 2- butanone        | S         | S          |
| Alcohols    | Glycol             | I         | I          |

<sup>a</sup> P = precipitation; S = solution.

Table S2. Different solvent parameters.

| Class of solvent | Solvents           | $\delta_a$ (cal cm <sup>-3</sup> ) <sup>1/2</sup> | $E_T(30)^{[1]}$<br>(kcal mol <sup>-1</sup> ) | $\epsilon$ |
|------------------|--------------------|---------------------------------------------------|----------------------------------------------|------------|
| Aromatic         | Benzene            | 1                                                 | 34.5                                         | 2.27       |
|                  | Toluene            | 1.22                                              | 33.9                                         | 2.379      |
|                  | Chlorobenzene      | 2.33                                              | 38.1                                         | 5.6        |
|                  | Nitrobenzene       | 4.65                                              | 42                                           | 34.8       |
| Chlorinated      | Chloroform         | 3.18                                              | 39.1                                         | 4.806      |
|                  | Dichloromethane    | 4.31                                              | 38.1                                         | 9.08       |
|                  | 1,2-dichloroethane | 4.12                                              | 41.3                                         | 10.37      |
| Alkanes          | Cyclohexane        | 0.1                                               | 31.2                                         | 2.1        |
| esters           | Ethyl acetate      | 4.36                                              | 38.1                                         | ---        |
|                  | Methyl acetate     | 4.36                                              | 40.0                                         | ---        |
| ethers           | Tetrahydrofuran    | 4.8                                               | 37.4                                         |            |
|                  | Diethyl ether      | 2.87                                              | 34.6                                         | 4.335      |

|          |                   |       |      |       |
|----------|-------------------|-------|------|-------|
| ketones  | Acetone           | 6.13  | 42.2 | ---   |
| alcohols | Glycol            | 13.8  | 56.3 | 41.4  |
|          | Methanol          | 12.44 | 55.4 | 33.62 |
|          | Ethanol           | 10.43 | 51.6 | 25.07 |
|          | n-propanol        | 9.12  | 50.7 | 20.8  |
|          | n-butanol         | 8.19  | 50.2 | 17.84 |
| Others   | Acetonitrile      | 9.3   | 45.6 | 38.8  |
|          | Dimethylformamide | 8.67  | 43.8 | 37.6  |
|          | Dimethylsulfoxide | 9.43  | 45.1 | 48.9  |

Table S3. Gibbs energies of solvation of hexane in various solvents at 298K in kJ/mol

| Class of solvent | Solvents           | Gibbs energies ( $\Delta G_{\text{solv}}$ ) |
|------------------|--------------------|---------------------------------------------|
| Aromatic         | Benzene            | -1.2                                        |
|                  | Toluene            | -2.6                                        |
|                  | Chlorobenzene      | -2.0                                        |
|                  | Nitrobenzene       | 0.4                                         |
| Chlorinated      | Chloroform         | -2.2                                        |
|                  | Dichloromethane    | ---                                         |
|                  | 1,2-dichloroethane | 0.1                                         |
| Alkanes          | Cyclohexane        | -3.5                                        |
| esters           | Ethyl acetate      | -0.8                                        |
|                  | Methyl acetate     | ---                                         |
| ethers           | Tetrahydrofuran    | -2.1                                        |
|                  | Diethyl ether      | ---                                         |
| ketones          | Acetone            | 0.9                                         |
| alcohols         | Glycol             | 11.9                                        |
|                  | Methanol           | 4.2                                         |
|                  | Ethanol            | 2.2                                         |
|                  | n-propanol         | 1.4                                         |
|                  | n-butanol          | 0.0                                         |
| Others           | Acetonitrile       | 4.1                                         |
|                  | Dimethylformamide  | 3.2                                         |
|                  | Dimethylsulfoxide  | 7.3                                         |

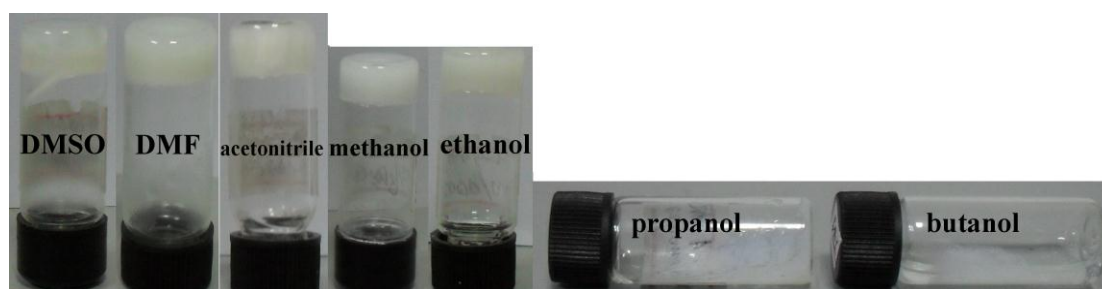

Fig. S1. Gel images of 4-POXD-B8 in various solvents.

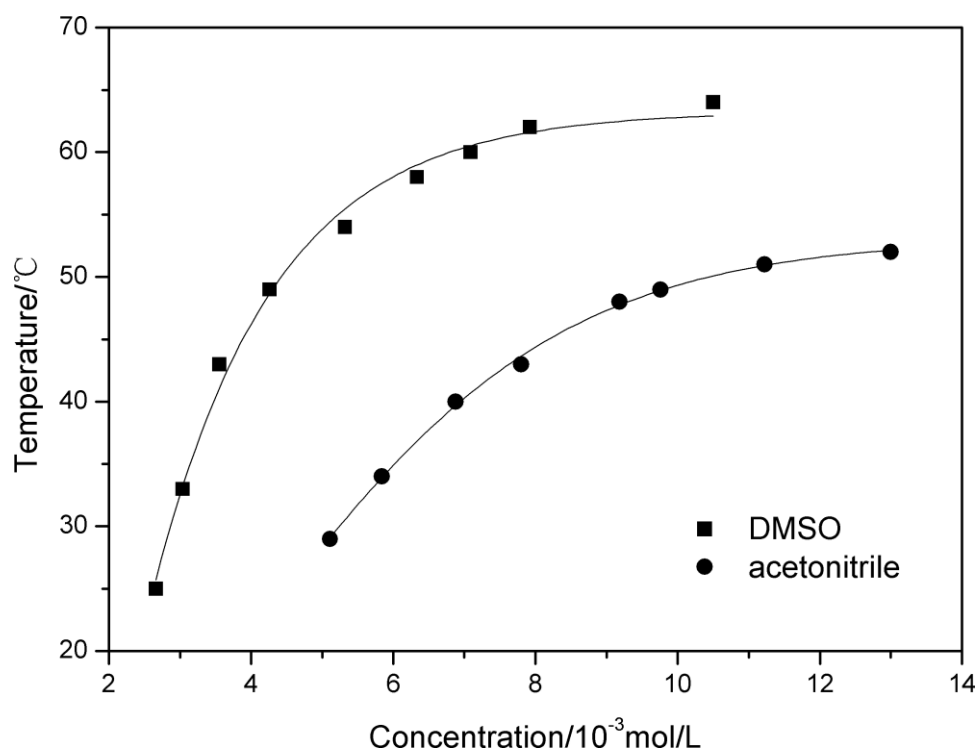

Fig. S2. Gel-sol phase-transition curves of 4-POXD-B12 in DMSO, acetonitrile.

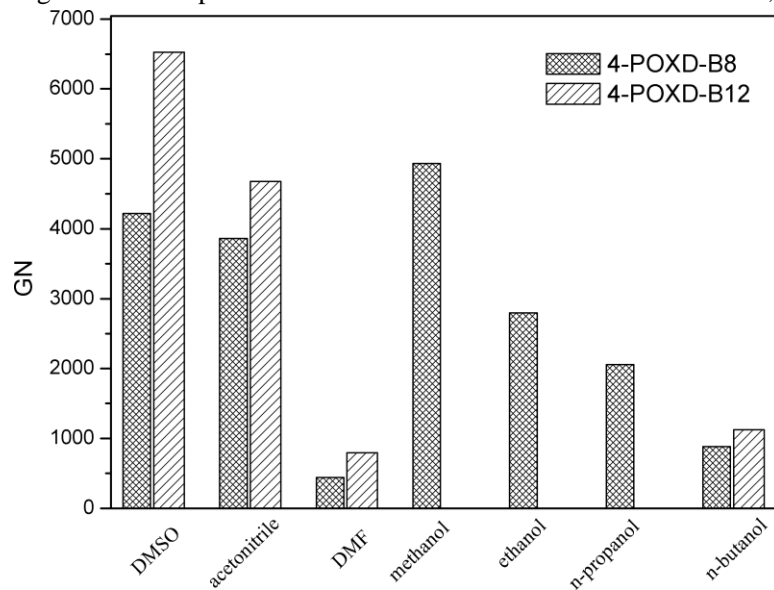

Fig. S3. GN for gelators 4-POXD-Bn (n = 8, 12) in the studied solvents.

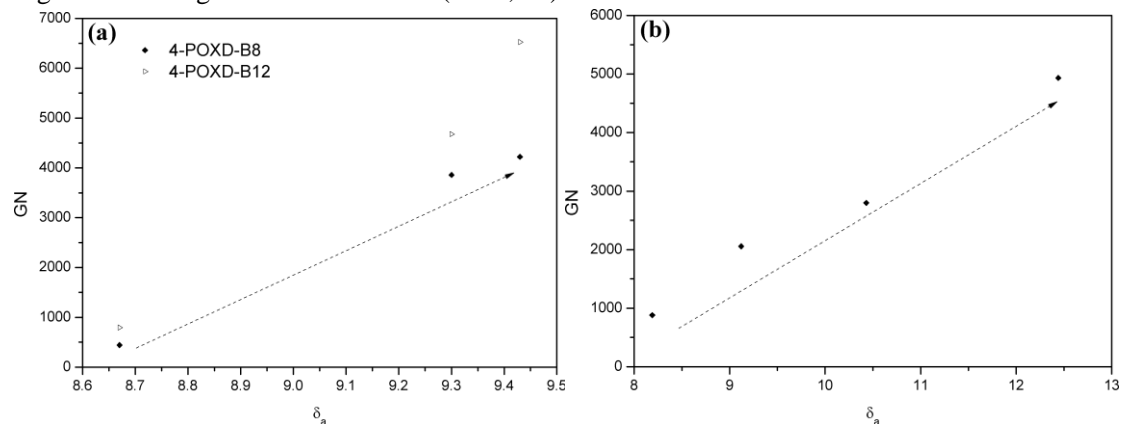

Fig. S4. Effect of the polar solubility parameter  $\delta_a$  on GN of gelator 4-POXD-Bn. (a) “other” solvents, (b) alcohol solvents.

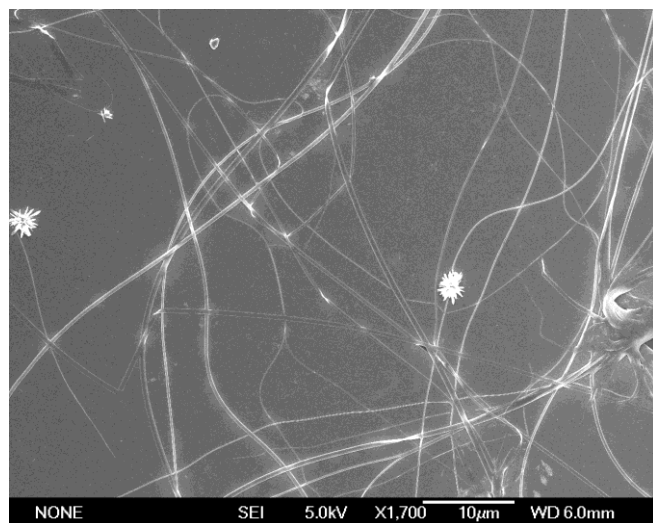

Fig. S5. SEM images of 4-POXD-B8 on Si underlay after solvent had evaporated from  $1.8 \times 10^{-4}$  mol/L DMSO solutions of the compound drop cast on the surface. (Solvent evaporated at room-temperature)

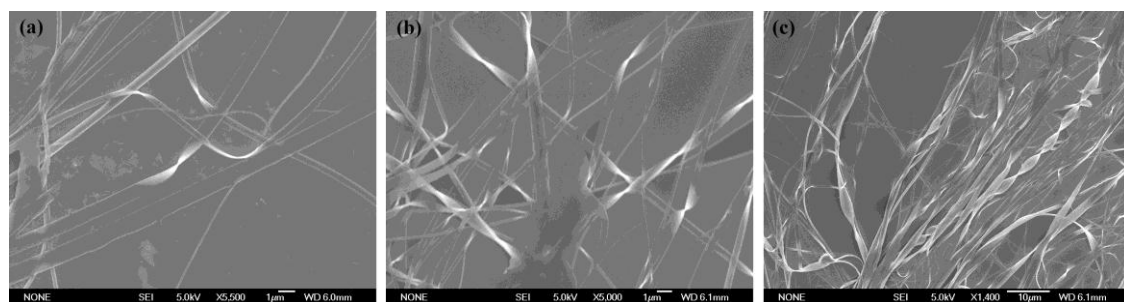

Fig S6. SEM images of 4-POXD-B8 on Si underlay after solvent had evaporated from (a)  $1.8 \times 10^{-4}$  mol/L, (b)  $5.3 \times 10^{-4}$  mol/L, and (c)  $1.0 \times 10^{-3}$  mol/L DMSO solutions of the compound drop cast on the surface. (Solvent evaporated at room-temperature)

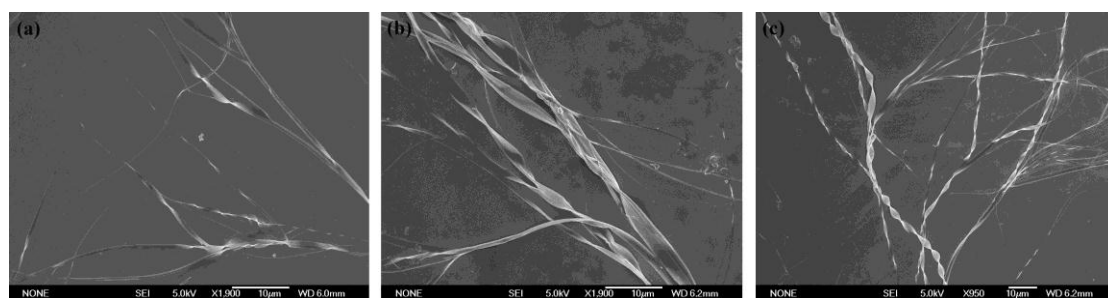

Fig. S7. SEM images of 4-POXD-B8 on Si underlay after solvent had evaporated from (a), (b)  $1.1 \times 10^{-4}$  mol/L and (c)  $2.3 \times 10^{-4}$  mol/L DMF solutions of the compound drop cast on the surface. (Solvent evaporated at room-temperature)

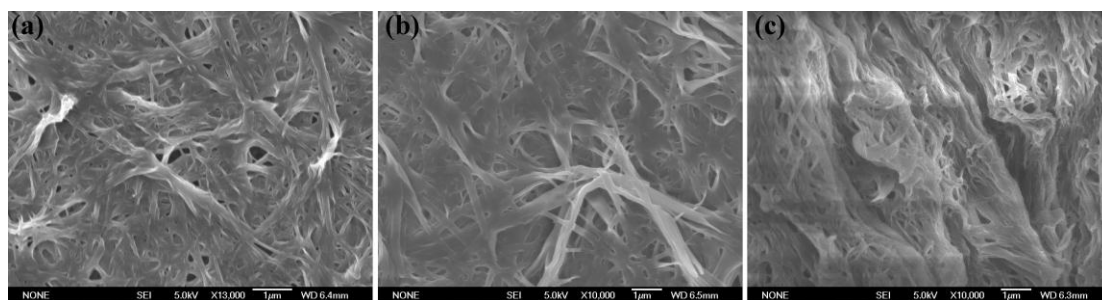

Fig. S8. SEM images of 4-POXD-B12 xerogels from (a) DMSO, (b) acetonitrile, and (c) DMF.

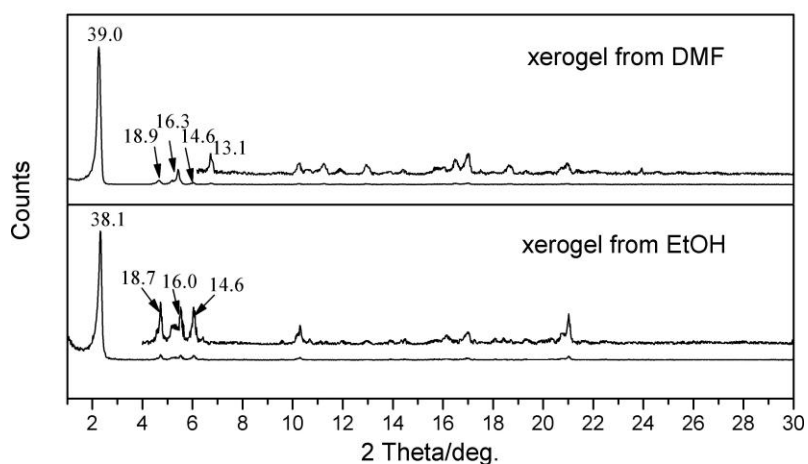

Fig. S9. X-Ray diffraction (XRD) spectra of 4-POXD-B8 xerogels from DMF and ethanol.

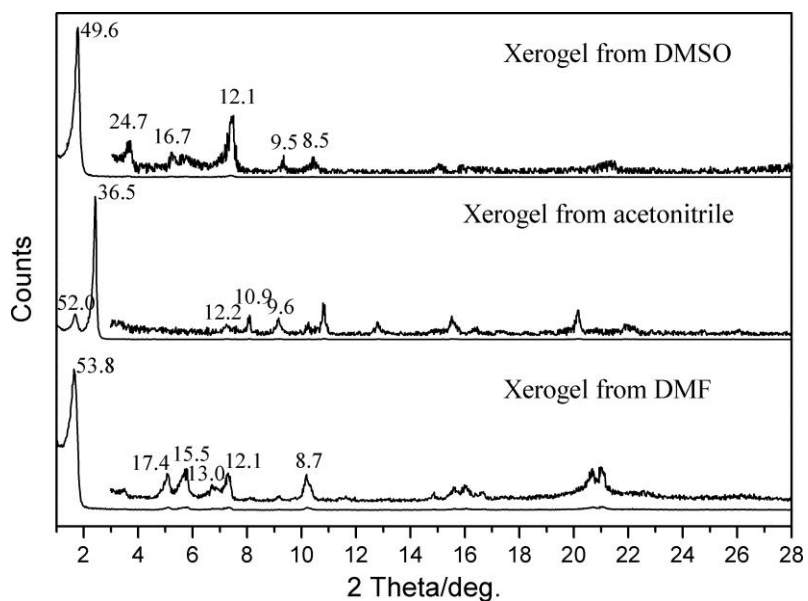

Fig. S10. X-Ray diffraction (XRD) spectra of 4-POXD-B12 xerogels from DMSO, acetonitrile and DMF.

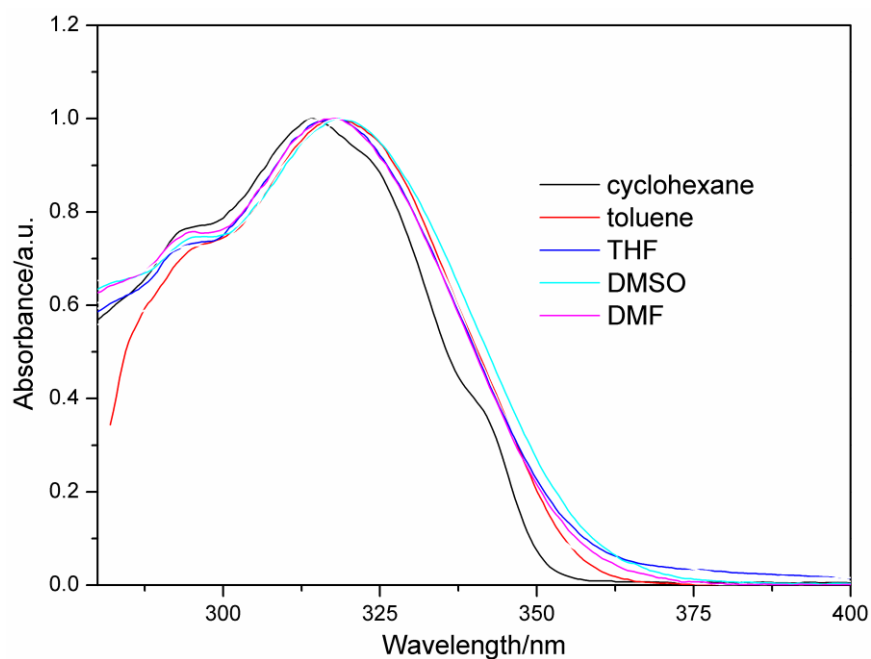

Fig. S11. UV-vis spectra of 4-POXD-B8 in aprotic solvents.

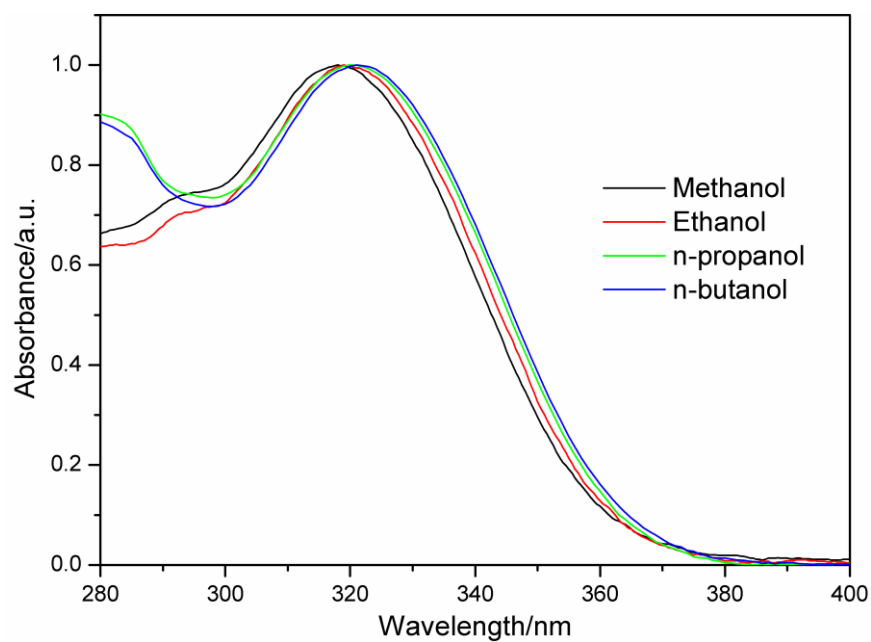

Fig. S12. UV-vis spectra of 4-POXD-B8 in protic solvents.

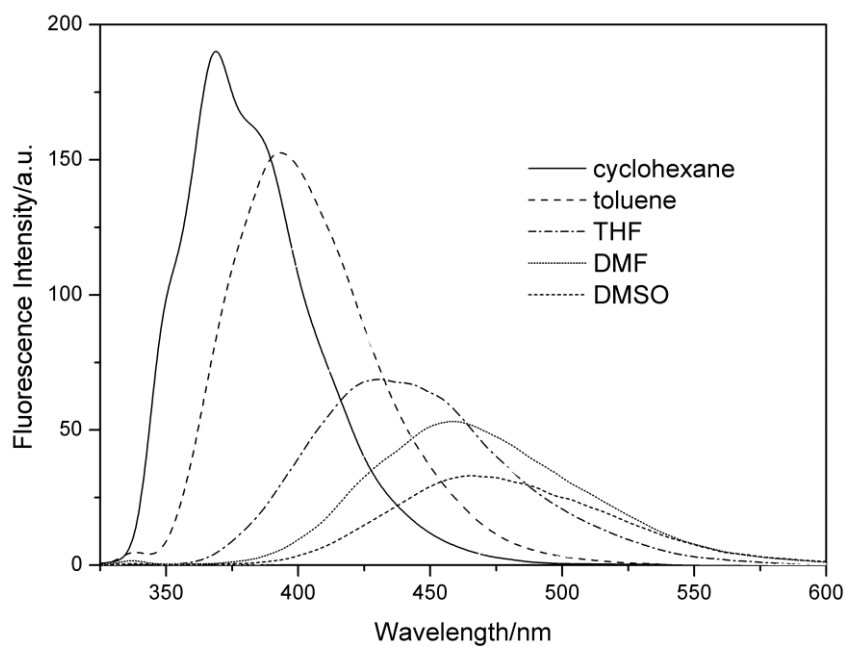

Fig. S13. FL spectra of 4-POXD-B8 in different solvents at a concentration of  $1 \times 10^{-5}$  mol/L at room temperature.

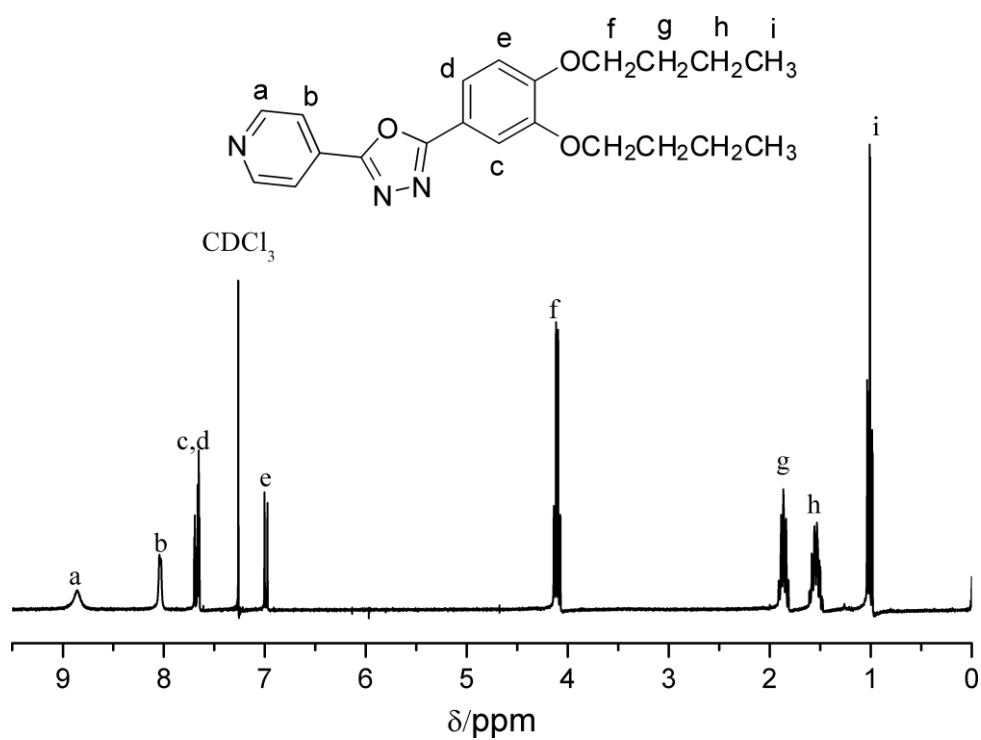

Fig. S14.  $^1\text{H}$  NMR spectrum of 4-POXD-B4 in  $\text{CDCl}_3$ .

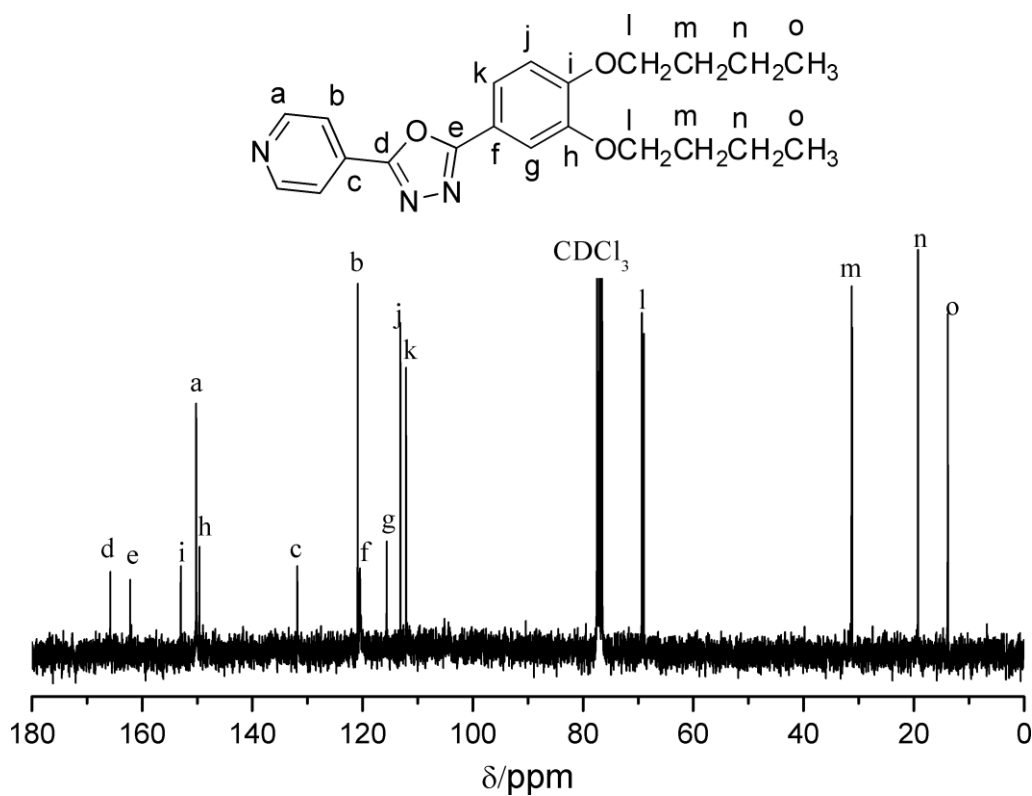

Fig. S15.  $^{13}\text{C}$  NMR spectrum of 4-POXD-B4 in  $\text{CDCl}_3$ .

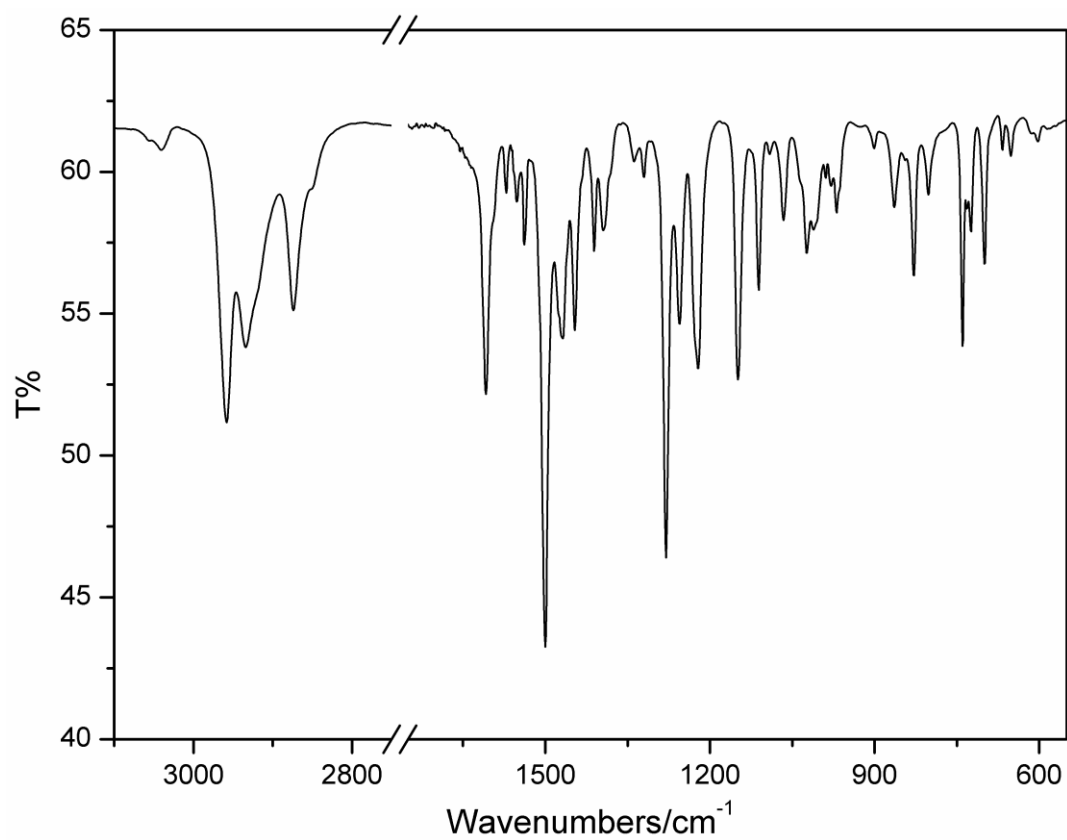

Fig. S16. FTIR spectrum of 4-POXD-B4 powder.

[1] Reichardt, C. solvents and solvent effects in organic chemistry, 3<sup>rd</sup> ed, Wiley-VCH: New York, 2003.
